# Supplementary material for: Intratumoral heterogeneity and clonal evolution in liver cancer
Source: PubMed Central journal article supplement (PMC6962317; doi:10.1038/s41467-019-14050-z), 2020-01-15
Supplement: 41467_2019_14050_MOESM1_ESM.pdf [file 41467_2019_14050_MOESM1_ESM.pdf]

Supplementary Information for:

**Intra-tumoral heterogeneity and clonal evolution in liver cancer**

Losic & Craig et al.

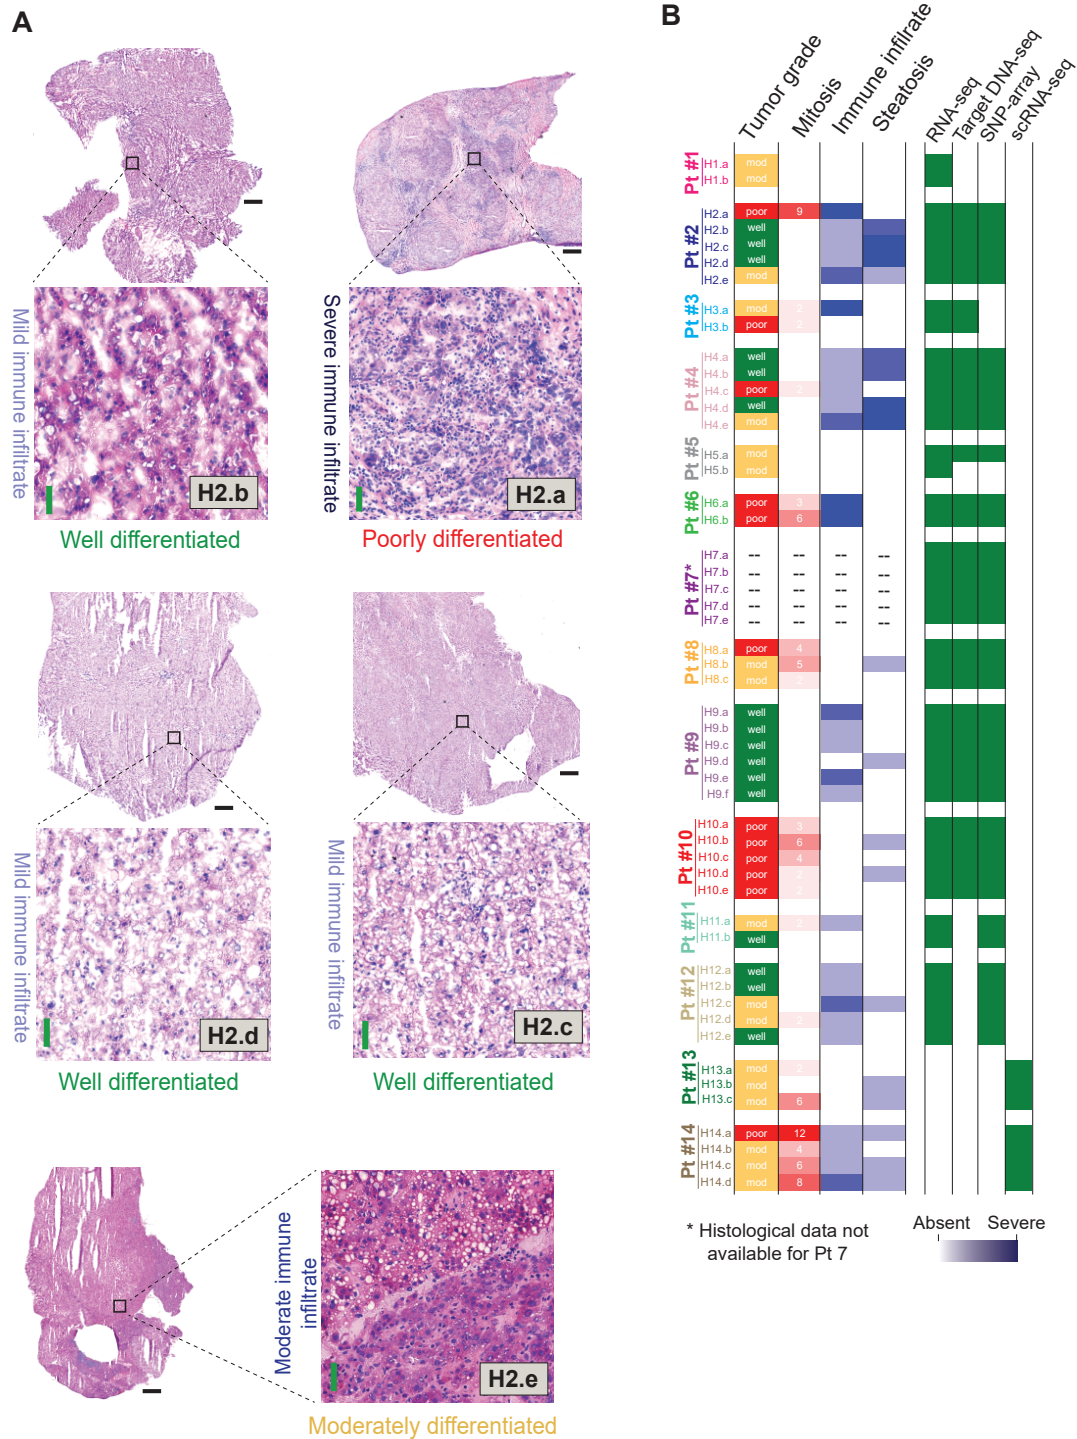

**Supplementary Figure 1.** (A) Representative H&E of the tumor regions in P02 showing phenotypic heterogeneity, both in tumor grade and immune infiltrate (black bars represent 1 mm; green bars represent 50  $\mu$ m, N=1 experiment). (B) Summary of the histological evaluation and genomic profiling of the regions analyzed.

**A**

H2.a

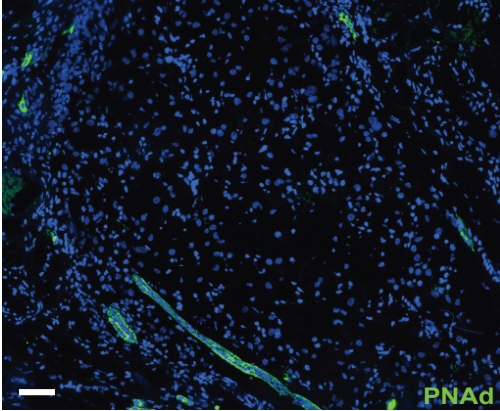

H2.e

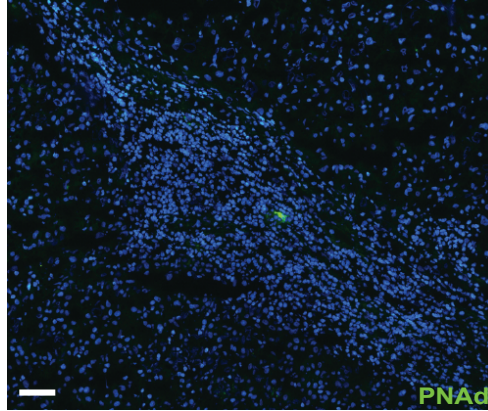

**B**

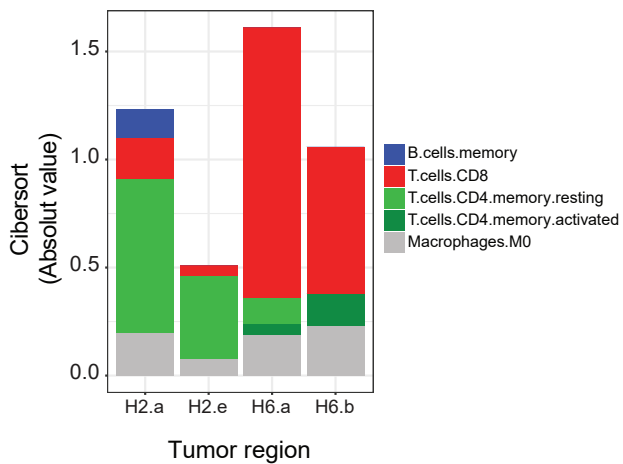

**C**

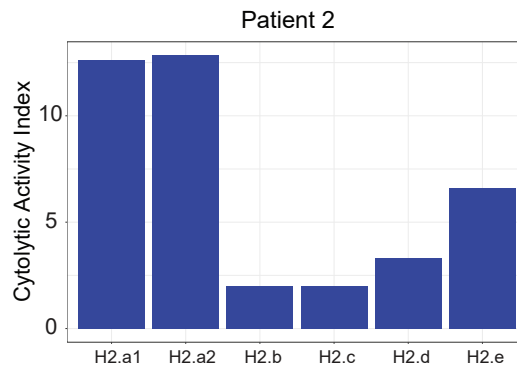

**Supplementary Figure 2.** (A) Immunofluorescence staining of PNAd in regions H2.a and H2.e of patient 2 to detect High Endothelial Venules as part of TLS (Blue: DAPI; Green: PNAd; white bars represent 50  $\mu\text{m}$ ,  $N=3$  independent experiments). (B) Absolute values for memory B cells, CD8 T cells, CD4 memory resting T cells, CD4 memory activated T cells and M0 macrophages for regions H2.a, H2.e, H6.a and H6.b as determined by Cibersort. (C) Cytolytic Activity Index across regions of patient 2. Each bar represents 1 sample.

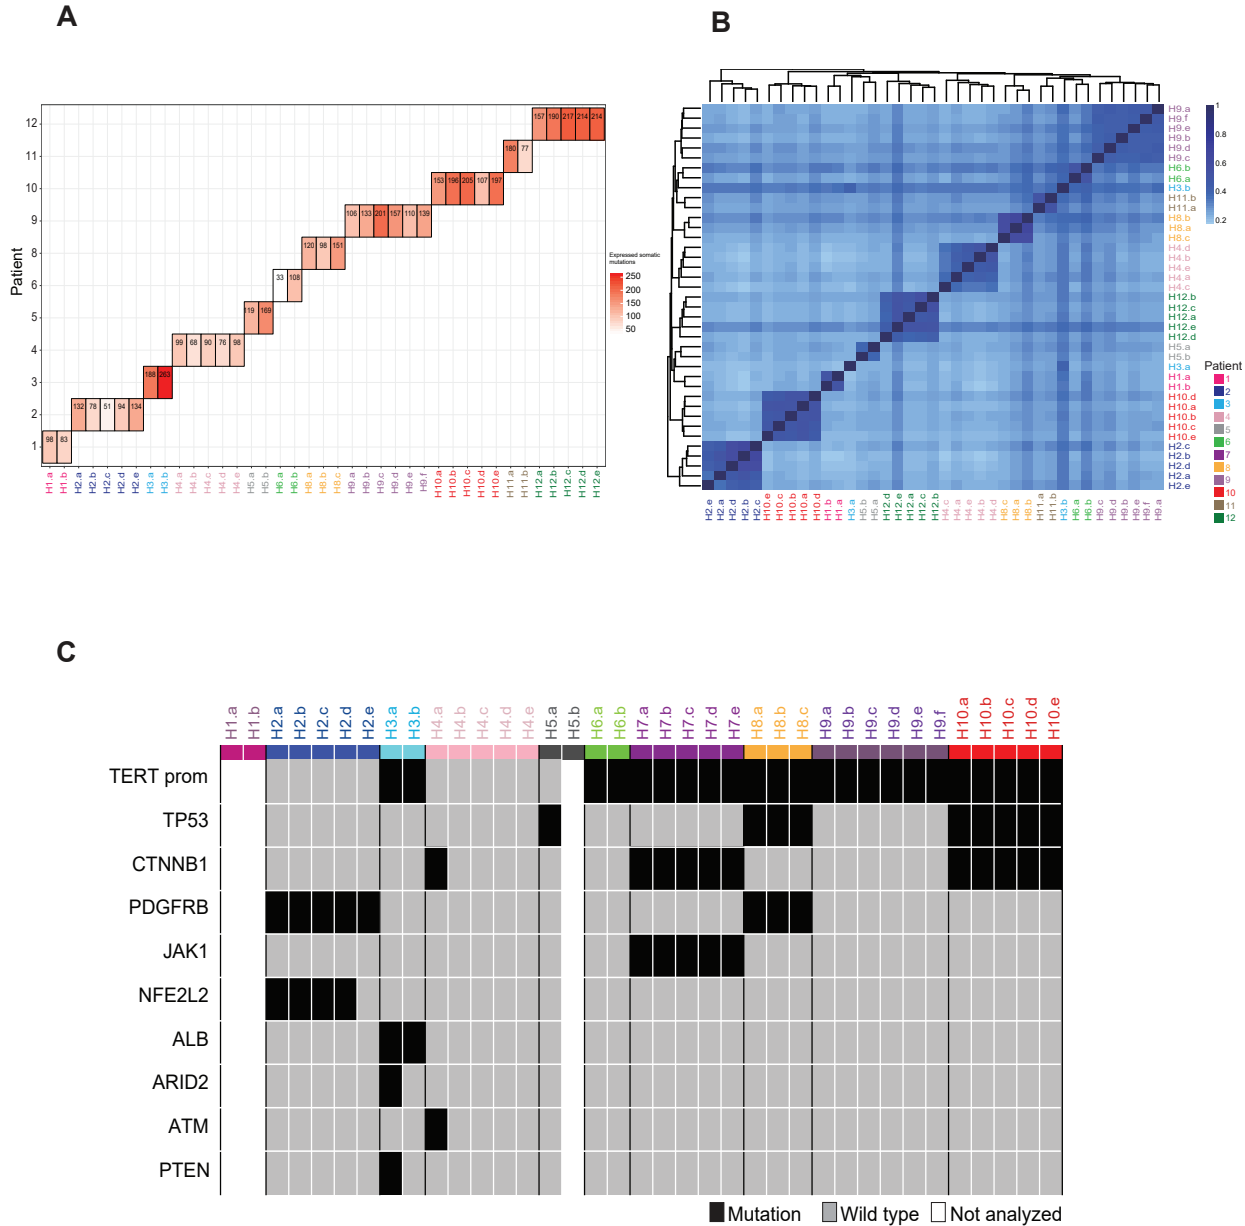

**Supplementary Figure 3.** (A) Number of somatic expressed mutations identified from RNA-sequencing data for each tumoral region. (B) Clustering of the overlap of RNA-seq identified somatic mutations for all tumoral regions (blue scale represents Pearson's coefficient values). (C) Somatic mutations identified by DNA targeted sequencing. All mutations were called based on a VAF of at least 5% and predicted as damaging by polyphen or SIFT. Source data are provided as a Source Data file.

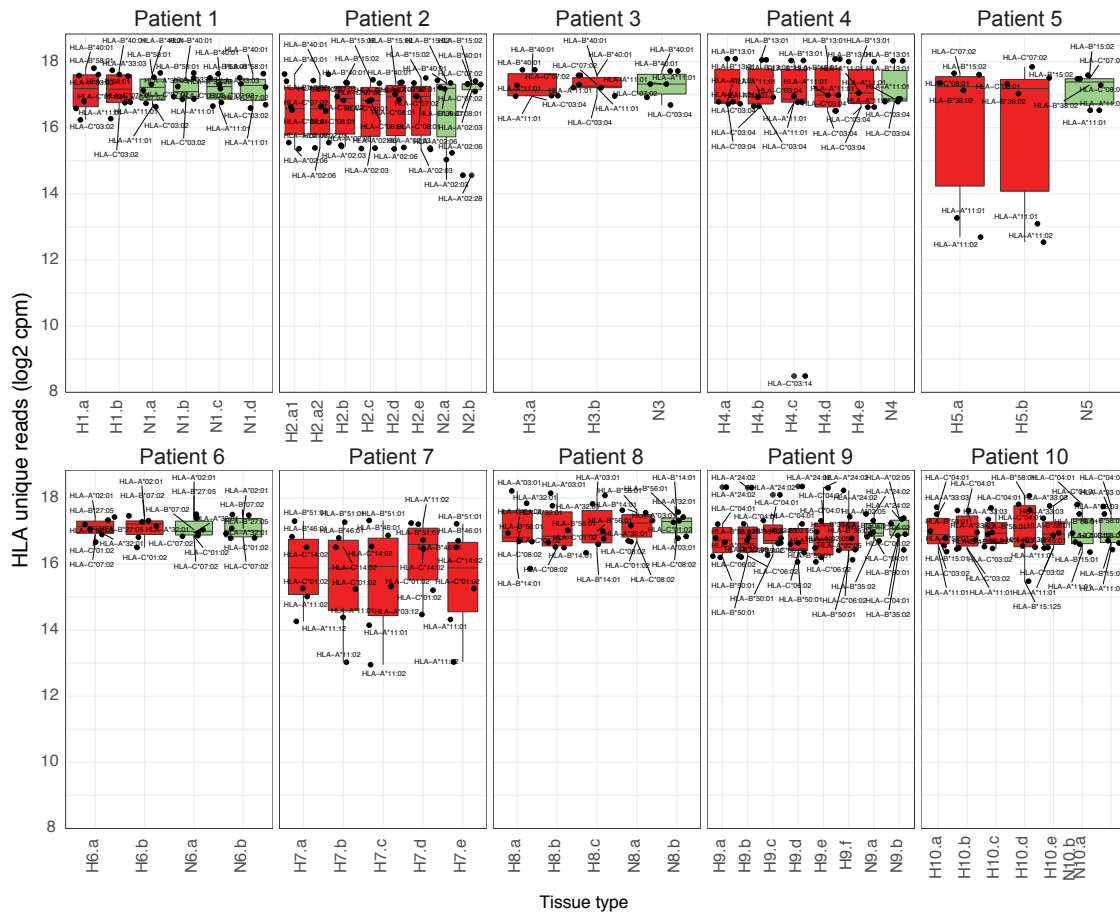

**Supplementary Figure 4.** Expression of HLA-I alleles (unique reads) across all regions of distinct patients, including non-tumoral adjacent tissue (HCC: Red; Adjacent non-tumoral: Green, allele-specific expression in units of log2 counts per million across  $N > 100$  alleles. For each boxplot, the centre line represents the median. Upper and lower limits of each box represent the 75th and 25th percentiles, respectively. The whiskers represent the lowest data point still within  $1.5 \times$  box size of the lower quartile and the highest data point still within  $1.5 \times$  box size of the upper quartile. Source data are provided as a Source Data file.

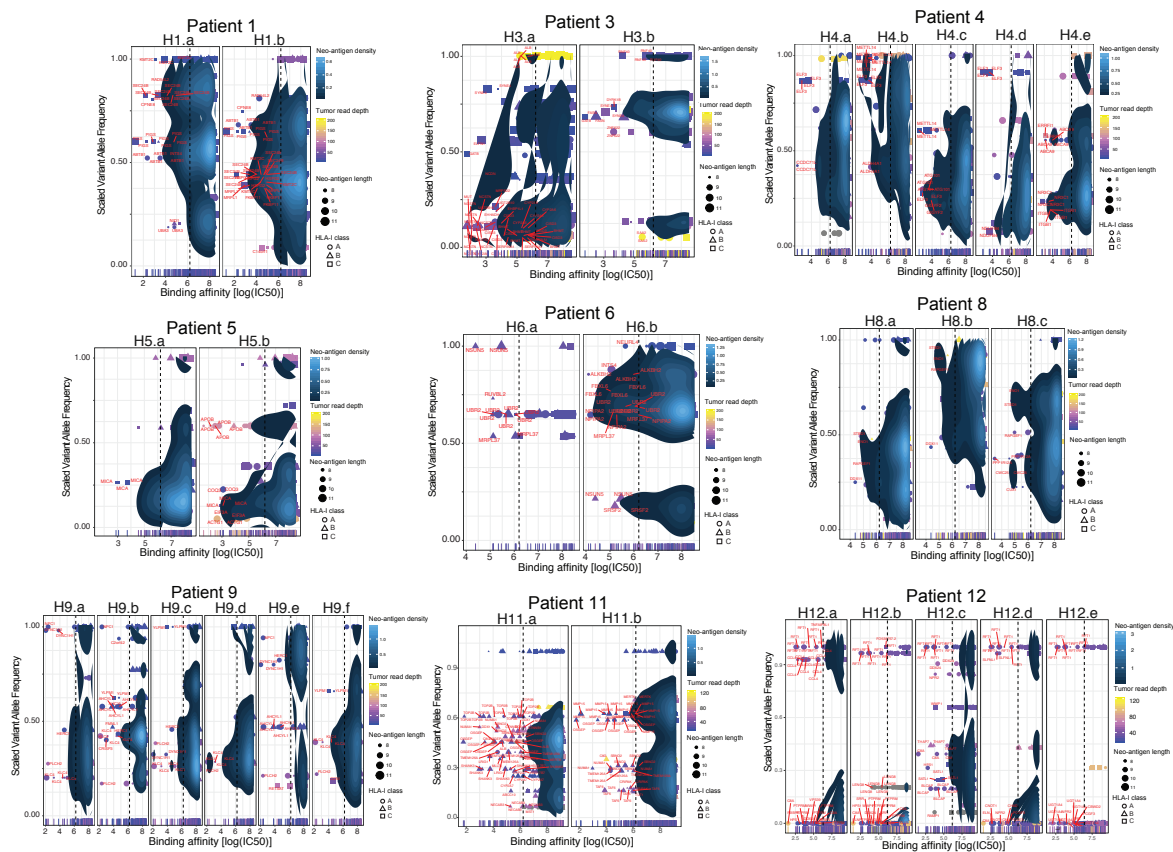

**Supplemental Figure 5.** 2D density of log-scaled peptide binding affinity as a function of the VAF of somatic mutations across regions of the remaining patients not included in Fig 2. Dotted line depicts 50% inhibitory concentration (ic50)=500 nM (lower ic50 means stronger binding and higher immunogenicity). Source data are provided as a Source Data file.



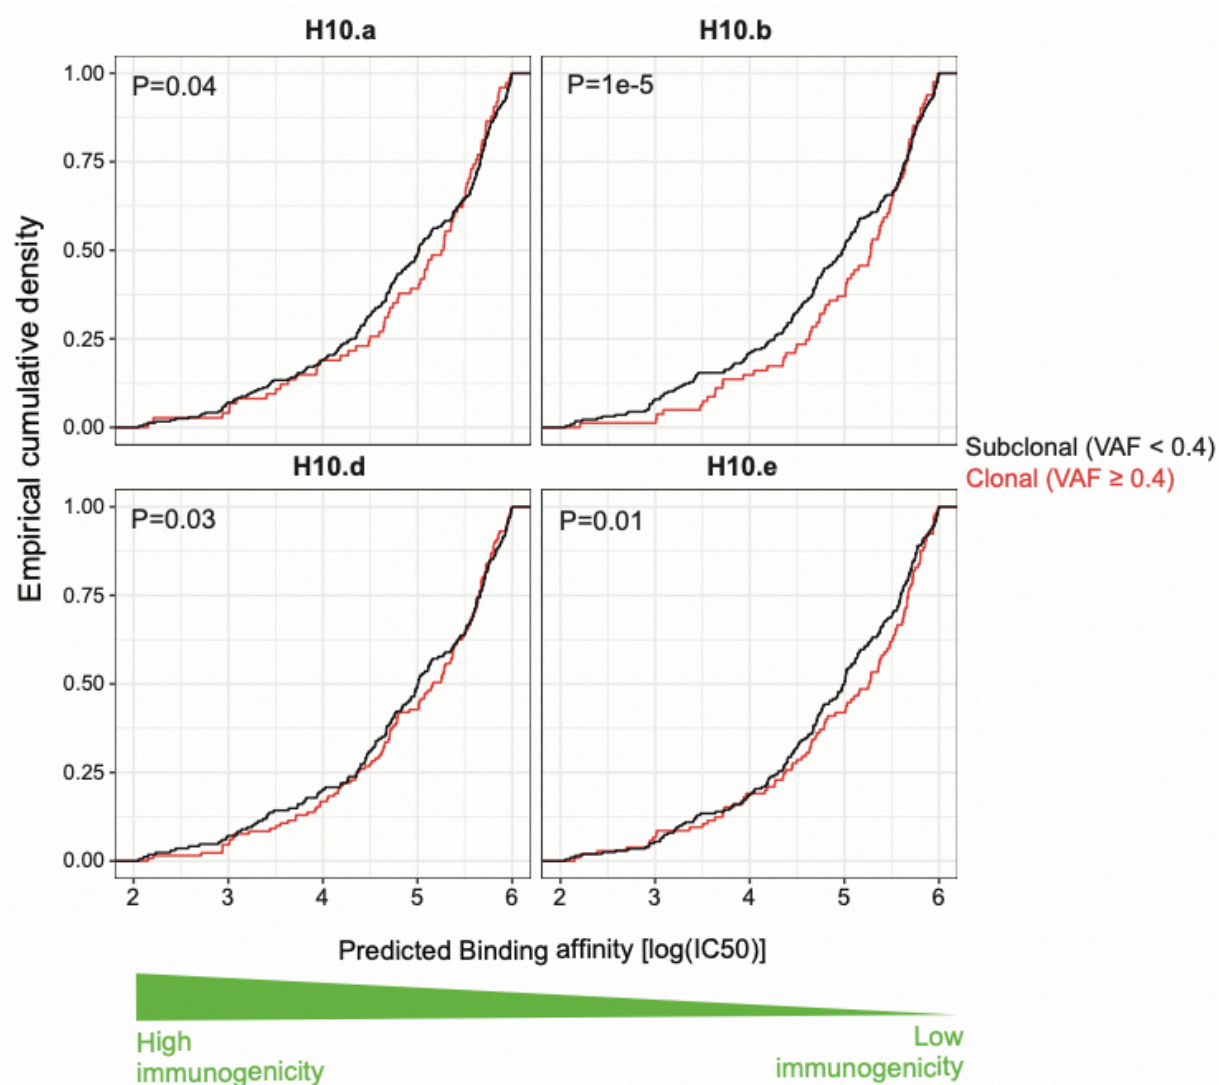

**Supplemental Figure 6.** Empirical cumulative density plot of log-scaled binding affinity distribution for neoantigens according to VAF of expressed mutations in each tumoral region of patient 10 determined from orthogonal whole exome sequencing. Kolmogorov-Smirnov test with one-sided alternative hypothesis. P-value is for rejecting the null in favor of the alternative. Source data are provided as a Source Data file.

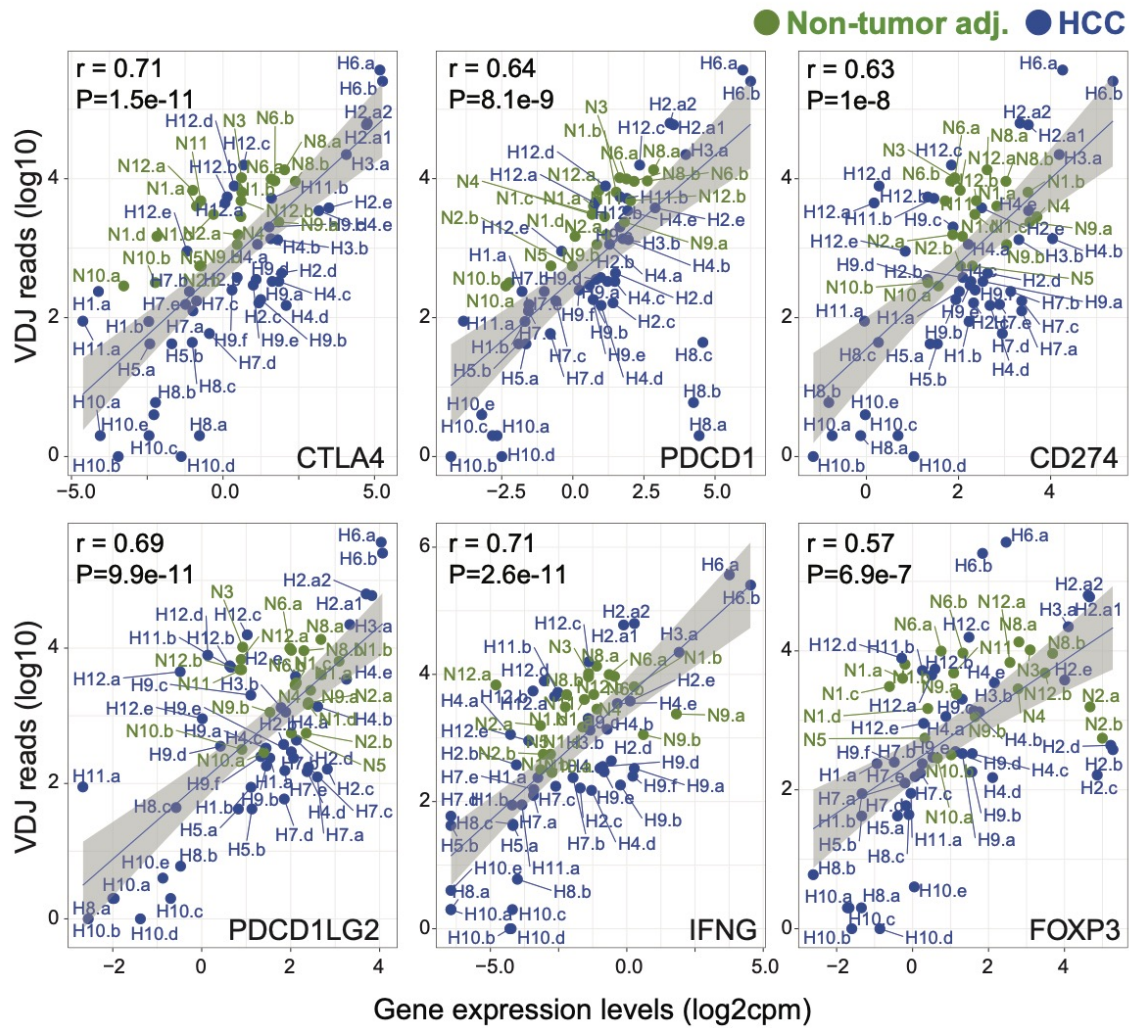

**Supplemental Figure 7.** Correlation of gene expression of key immune (checkpoint) genes *CD274*, *CTLA4*, *IFNG*, *PDCD1*, *PDCD1LG2*, *FOXP3* and VDJ reads, as a proxy for TIL burden (HCC: Blue; Adjacent non-tumoral: Green, N=63 samples). Source data are provided as a Source Data file.



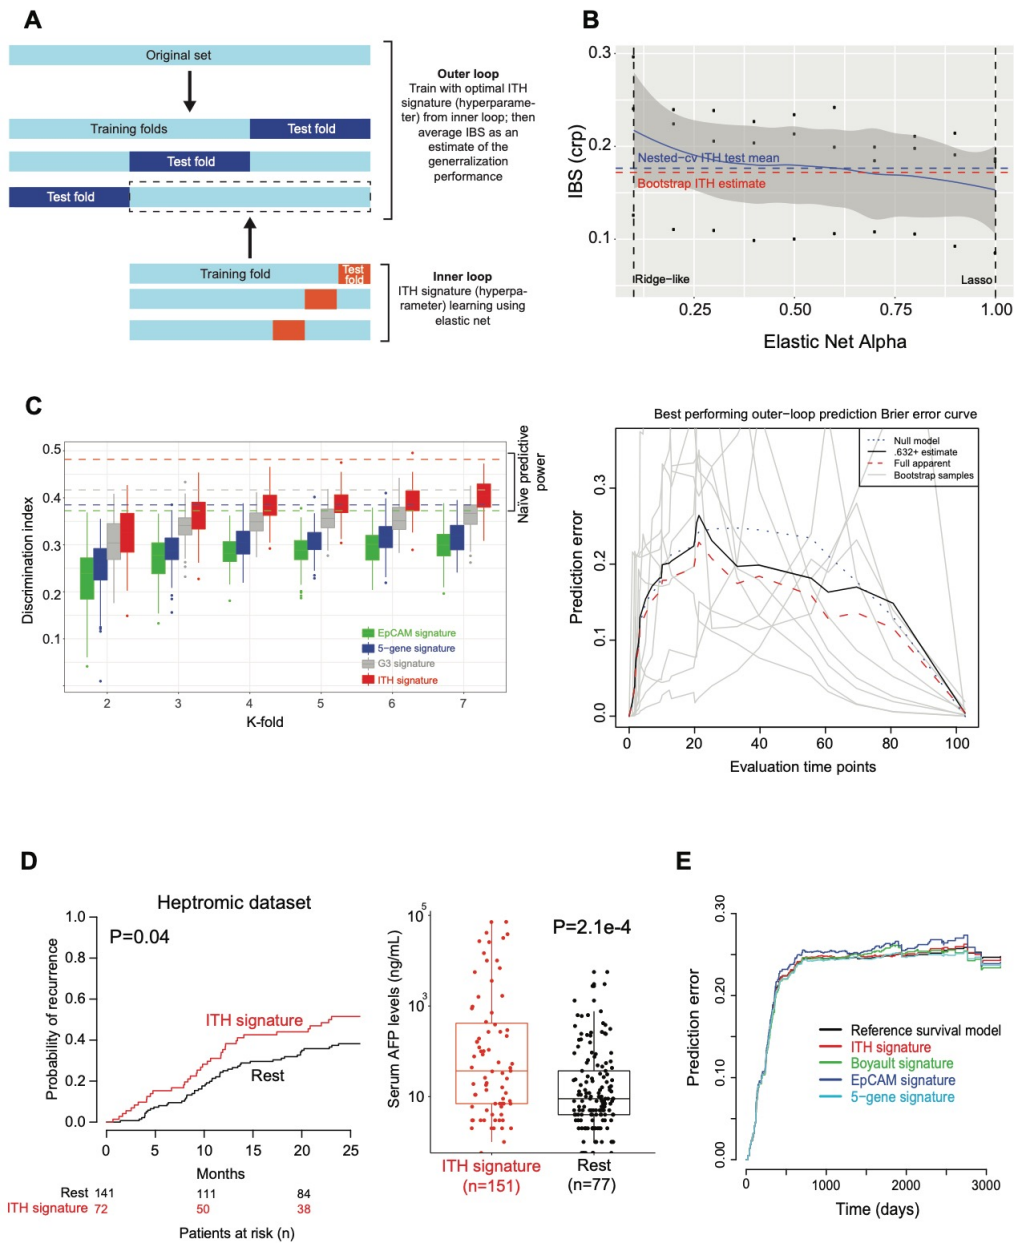

**Supplemental Figure 8.** (A) Repeated cross validation of fitted survival models. (B) Corrected discrimination index as a function of the number of groups of patients that are omitted in the cross-validation simulation (N=500 simulations). The nominal (optimistic) discrimination index is also shown. (C) Probability of early tumor recurrence over time for patients in the Heptromic Cohort with or without the ITH signature (Kaplan-Meier (log-rank) test). (D) Box plot of Serum AFP levels for patients in the Heptromic Cohort with or without the ITH signature (T-test, two-sided). For each boxplot, the centre line represents the median. Upper and lower limits of each box represent the 75th and 25th percentiles, respectively. The whiskers represent the lowest data point still within  $1.5 \times$  box size of the lower quartile and the highest data point still within  $1.5 \times$  box size of the upper quartile. (E) Prediction error curves of competing parametric Cox proportional hazard models depicting time dependent Brier score for models built from principal components of the G3, EpCAM, 5-gene and ITH signatures. Source data are provided as a Source Data file.

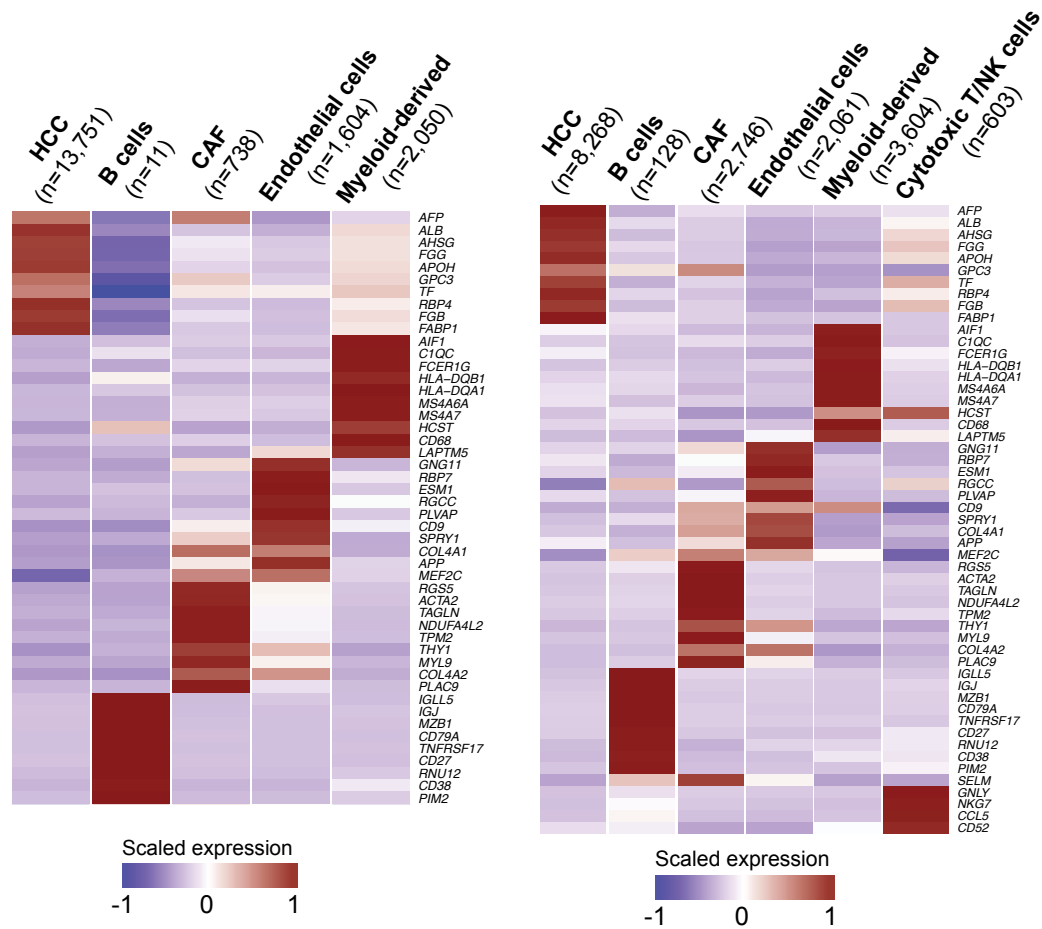

**Supplemental Figure 9.** Heatmap of differential gene expression in single-cell data across the different cell clusters as per t-SNE plot for patient 13 (left) and patient 14 (right). Source data are provided as a Source Data file.

**Supplemental Table 1: Clinical and pathological characteristics of the samples included.**

| Patient | Gender | Age | Etiology    | Size (cm) | Sample | Type     | RNA-seq | Tumor grade (WHO) | Immune infiltrate | Tumor cell steatosis      | Mitosis (n/10 HPF) | Fibrosis adjacent tissue† |
|---------|--------|-----|-------------|-----------|--------|----------|---------|-------------------|-------------------|---------------------------|--------------------|---------------------------|
| 1       | Male   | 59  | HBV         | 4         | H1.a   | HCC      | Yes     | Moderately        | Absent            | Absent                    | 1                  | NA                        |
|         |        |     |             |           | H1.b   | HCC      | Yes     | Moderately        | Absent            | Absent                    | 1                  | NA                        |
|         |        |     |             |           | N1.a   | Adjacent | Yes     | NA                | NA                | NA                        | NA                 | Mild (F1-F2)              |
|         |        |     |             |           | N1.b   | Adjacent | Yes     | NA                | NA                | NA                        | NA                 | Mild (F1-F2)              |
|         |        |     |             |           | N1.c   | Adjacent | Yes     | NA                | NA                | NA                        | NA                 | Mild (F1-F2)              |
|         |        |     |             |           | N1.d   | Adjacent | Yes     | NA                | NA                | NA                        | NA                 | Mild (F1-F2)              |
| 2       | Female | 52  | HBV         | 6.5       | H2.a   | HCC      | Yes     | Poor              | Severe            | Absent                    | 9                  | NA                        |
|         |        |     |             |           | H2.b   | HCC      | Yes     | Well              | Mild              | Moderate                  | 1                  | NA                        |
|         |        |     |             |           | H2.c   | HCC      | Yes     | Well              | Mild              | Severe (microvesicular)   | 1                  | NA                        |
|         |        |     |             |           | H2.d   | HCC      | Yes     | Well              | Mild              | Severe (microvesicular)   | 1                  | NA                        |
|         |        |     |             |           | H2.e   | HCC      | Yes     | Moderately        | Moderate          | Mild                      | 1                  | NA                        |
|         |        |     |             |           | N2.a   | Adjacent | Yes     | NA                | NA                | NA                        | NA                 | Mild (F1-F2)              |
|         |        |     |             |           | N2.b   | Adjacent | Yes     | NA                | NA                | NA                        | NA                 | Mild (F1-F2)              |
| 3       | Female | 70  | HBV         | 3         | H3.a   | HCC      | Yes     | Moderately        | Severe            | Absent                    | 2                  | NA                        |
|         |        |     |             |           | H3.b   | HCC      | Yes     | Poor              | Absent            | Absent                    | 2                  | NA                        |
|         |        |     |             |           | N3     | Adjacent | Yes     | NA                | NA                | NA                        | NA                 | Severe (F3-F4)            |
| 4       | Male   | 54  | HBV         | 15.5      | H4.a   | HCC      | Yes     | Well              | Mild              | Moderate                  | 1                  | NA                        |
|         |        |     |             |           | H4.b   | HCC      | Yes     | Well              | Mild              | Moderate (microvesicular) | 1                  | NA                        |
|         |        |     |             |           | H4.c   | HCC      | Yes     | Poor              | Mild              | Absent                    | 2                  | NA                        |
|         |        |     |             |           | H4.d   | HCC      | Yes     | Well              | Mild              | Severe                    | 1                  | NA                        |
|         |        |     |             |           | H4.e   | HCC      | Yes     | Moderately        | Moderate          | Severe                    | 1                  | NA                        |
|         |        |     |             |           | N4     | Adjacent | Yes     | NA                | NA                | NA                        | NA                 | Mild (F1-F2)              |
| 5       | Female | 61  | HBV         | 6         | H5.a   | HCC      | Yes     | Moderately        | Absent            | Absent                    | 1                  | NA                        |
|         |        |     |             |           | H5.b   | HCC      | Yes     | Moderately        | Absent            | Absent                    | 1                  | NA                        |
|         |        |     |             |           | N5     | Adjacent | Yes     | NA                | NA                | NA                        | NA                 | Mild (F1-F2)              |
| 6       | Male   | 74  | Cryptogenic | 10        | H6.a   | HCC      | Yes     | Poor              | Severe            | Absent                    | 3                  | NA                        |
|         |        |     |             |           | H6.b   | HCC      | Yes     | Poor              | Severe            | Absent                    | 6                  | NA                        |
|         |        |     |             |           | N6.a   | Adjacent | Yes     | NA                | NA                | NA                        | NA                 | No fibrosis               |
|         |        |     |             |           | N6.b   | Adjacent | Yes     | NA                | NA                | NA                        | NA                 | No fibrosis               |
| 7       | Male   | 58  | Cryptogenic | 3.5       | H7.a   | HCC      | Yes     | NE                | NE                | NE                        | NE                 | NE                        |
|         |        |     |             |           | H7.b   | HCC      | Yes     | NE                | NE                | NE                        | NE                 | NE                        |
|         |        |     |             |           | H7.c   | HCC      | Yes     | NE                | NE                | NE                        | NE                 | NE                        |
|         |        |     |             |           | H7.d   | HCC      | Yes     | NE                | NE                | NE                        | NE                 | NE                        |
|         |        |     |             |           | H7.e   | HCC      | Yes     | NE                | NE                | NE                        | NE                 | NE                        |
| 8       | Male   | 51  | HCV         | 6.5       | H8.a   | HCC      | Yes     | Poor              | Absent            | Absent                    | 4                  | NA                        |
|         |        |     |             |           | H8.b   | HCC      | Yes     | Moderately        | Absent            | Mild (microvesicular)     | 5                  | NA                        |
|         |        |     |             |           | H8.c   | HCC      | Yes     | Moderately        | Absent            | Absent                    | 2                  | NA                        |
|         |        |     |             |           | N8.a*  | Adjacent | Yes     | NA                | Mild              | Absent                    | 1                  | Severe (F3-F4)            |
|         |        |     |             |           | N8.b   | Adjacent | Yes     | NA                | NA                | NA                        | NA                 | Severe (F3-F4)            |

|    |        |    |             |      |       |          |           |            |          |                       |    |                |
|----|--------|----|-------------|------|-------|----------|-----------|------------|----------|-----------------------|----|----------------|
| 9  | Male   | 79 | Cryptogenic | 13.5 | H9.a  | HCC      | Yes       | Well       | Moderate | Absent                | 1  | NA             |
|    |        |    |             |      | H9.b  | HCC      | Yes       | Well       | Mild     | Absent                | 1  | NA             |
|    |        |    |             |      | H9.c  | HCC      | Yes       | Well       | Mild     | Absent                | 1  | NA             |
|    |        |    |             |      | H9.d  | HCC      | Yes       | Well       | absent   | Mild                  | 1  | NA             |
|    |        |    |             |      | H9.e  | HCC      | Yes       | Well       | Moderate | Absent                | 1  | NA             |
|    |        |    |             |      | H9.f  | HCC      | Yes       | Well       | Mild     | Absent                | 1  | NA             |
|    |        |    |             |      | N9.a  | Adjacent | Yes       | NA         | NA       | NA                    | NA | No fibrosis    |
|    |        |    |             |      | N9.b  | Adjacent | Yes       | NA         | NA       | NA                    | NA | No fibrosis    |
| 10 | Male   | 75 | HBV         | 5    | H10.a | HCC      | Yes       | Poor       | absent   | Absent                | 3  | NA             |
|    |        |    |             |      | H10.b | HCC      | Yes       | Poor       | absent   | Mild (microvesicular) | 6  | NA             |
|    |        |    |             |      | H10.c | HCC      | Yes       | Poor       | absent   | Absent                | 4  | NA             |
|    |        |    |             |      | N10.a | Adjacent | Yes       | NA         | NA       | NA                    | NA | Severe (F3-F4) |
|    |        |    |             |      | H10.d | HCC      | Yes       | Poor       | Absent   | Mild (microvesicular) | 2  | NA             |
|    |        |    |             |      | H10.e | HCC      | Yes       | Poor       | Absent   | Absent                | 2  | NA             |
|    |        |    |             |      | N10.b | Adjacent | Yes       | NA         | NA       | NA                    | NA | Severe (F3-F4) |
| 11 | Male   | 61 | HCV         | 3.5  | H11.a | HCC      | Yes       | Moderately | Absent   | Absent                | 2  | NA             |
|    |        |    |             |      | H11.b | HCC      | Yes       | Well       | Mild     | Absent                | 1  | NA             |
|    |        |    |             |      | N11   | Adjacent | Yes       | NA         | NA       | NA                    | NA | Severe (F3-F4) |
| 12 | Female | 68 | HCV         | 13.5 | H12.a | HCC      | Yes       | Well       | Mild     | Absent                | 1  | NA             |
|    |        |    |             |      | H12.b | HCC      | Yes       | Well       | Mild     | Absent                | 1  | NA             |
|    |        |    |             |      | H12.c | HCC      | Yes       | Moderately | Moderate | Mild (microvesicular) | 1  | NA             |
|    |        |    |             |      | H12.d | HCC      | Yes       | Moderately | Mild     | Absent                | 2  | NA             |
|    |        |    |             |      | H12.e | HCC      | Yes       | Well       | Mild     | Absent                | 1  | NA             |
|    |        |    |             |      | N12.a | Adjacent | Yes       | NA         | NA       | NA                    | NA | Mild (F1-F2)   |
|    |        |    |             |      | N12.b | Adjacent | Yes       | NA         | NA       | NA                    | NA | Mild (F1-F2)   |
| 13 | Male   | 67 | Cryptogenic | 15   | H13.a | HCC      | scRNA-seq | Moderately | Absent   | Absent                | 2  | NA             |
|    |        |    |             |      | H13.b | HCC      | scRNA-seq | Moderately | Absent   | Mild                  | 1  | NA             |
|    |        |    |             |      | H13.c | HCC      | scRNA-seq | Moderately | Absent   | Mild                  | 6  | NA             |
| 14 | Female | 66 | HBV         | 8.5  | H14.a | HCC      | scRNA-seq | Poor       | Mild     | Mild                  | 12 | NA             |
|    |        |    |             |      | H14.b | HCC      | scRNA-seq | Moderately | Mild     | Absent                | 4  | NA             |
|    |        |    |             |      | H14.c | HCC      | scRNA-seq | Moderately | Mild     | Mild                  | 6  | NA             |
|    |        |    |             |      | H14.d | HCC      | scRNA-seq | Moderately | Moderate | Mild                  | 8  | NA             |

\* N8.a had contamination with tumor cells accounting for less than 10% of total cells in this sample (confirmed on H&E histological examination)

† Fibrosis stage as per METAVIR scoring system

NA: Not applicable

NE: Not evaluated

**Supplemental Table 2: DNA targeted deep sequencing and Sanger validation**

| Sample code | Patient | Location and variant | Gene code       | Consequence           | Gene          | SIFT prediction                   | Polyphen prediction       | Validated by sanger |
|-------------|---------|----------------------|-----------------|-----------------------|---------------|-----------------------------------|---------------------------|---------------------|
| H2.a        | 2       | 2:177234076<br>C/A   | ENSG00000116044 | missense variant      | <i>NFE2L2</i> | deleterious (0)                   | probably damaging (1)     | Not tested          |
| H2.b        | 2       | 2:177234076<br>C/A   | ENSG00000116044 | missense variant      | <i>NFE2L2</i> | deleterious (0)                   | probably damaging (1)     | Not tested          |
| H2.c        | 2       | 2:177234076<br>C/A   | ENSG00000116044 | missense variant      | <i>NFE2L2</i> | deleterious (0)                   | probably damaging (1)     | Not tested          |
| H2.d        | 2       | 2:177234076<br>C/A   | ENSG00000116044 | missense variant      | <i>NFE2L2</i> | deleterious (0)                   | probably damaging (1)     | Not tested          |
| H2.a        | 2       | 5:150130602<br>C/T   | ENSG00000113721 | missense variant      | <i>PDGFRB</i> | tolerated (0.25)                  | possibly damaging (0.513) | Yes                 |
| H2.e        | 2       | 5:150130602<br>C/T   | ENSG00000113721 | missense variant      | <i>PDGFRB</i> | tolerated (0.25)                  | possibly damaging (0.513) | Yes                 |
| H2.b        | 2       | 5:150130602<br>C/T   | ENSG00000113721 | missense variant      | <i>PDGFRB</i> | tolerated (0.25)                  | possibly damaging (0.513) | Yes                 |
| H2.c        | 2       | 5:150130602<br>C/T   | ENSG00000113721 | missense variant      | <i>PDGFRB</i> | tolerated (0.25)                  | possibly damaging (0.513) | Yes                 |
| H2.d        | 2       | 5:150130602<br>C/T   | ENSG00000113721 | missense variant      | <i>PDGFRB</i> | tolerated (0.25)                  | possibly damaging (0.513) | Yes                 |
| H3.a        | 3       | 4:73418113<br>G/A    | ENSG00000163631 | missense variant      | <i>ALB</i>    | deleterious (0)                   | probably damaging (1)     | No tissue available |
| H3.b        | 3       | 4:73418113<br>G/A    | ENSG00000163631 | missense variant      | <i>ALB</i>    | deleterious (0)                   | probably damaging (1)     | Not tested          |
| H3.a        | 3       | 10:87933126<br>C/T   | ENSG00000171862 | missense variant      | <i>PTEN</i>   | deleterious (0)                   | probably damaging (1)     | No tissue available |
| H3.a        | 3       | 5:1295113<br>G/A     | ENSG00000164362 | upstream gene variant | <i>TERT*</i>  |                                   |                           | No tissue available |
| H3.a        | 3       | 5:1295113<br>G/A     | ENSG00000164362 | upstream gene variant | <i>TERT*</i>  |                                   |                           | No tissue available |
| H4.a        | 4       | 11:108244960<br>A/T  | ENSG00000149311 | missense variant      | <i>ATM</i>    | deleterious (0)                   | possibly damaging (0.771) | Yes                 |
| H4.a        | 4       | 3:41224612<br>G/A    | ENSG00000168036 | missense variant      | <i>CTNNB1</i> | deleterious (0)                   | possibly damaging (0.997) | Not tested          |
| H5.a        | 5       | 17:7674216<br>C/A    | ENSG00000141510 | missense variant      | <i>TP53</i>   | deleterious (0)                   | probably damaging (0.994) | Not tested          |
| H6.b        | 6       | 1:26697482<br>C/A    | ENSG00000117713 | missense variant      | <i>ARID1A</i> | deleterious low confidence (0.03) | possibly damaging (0.699) | Yes                 |
| H6.a        | 6       | 5:1295113<br>G/A     | ENSG00000164362 | upstream gene variant | <i>TERT*</i>  |                                   |                           | Not tested          |
| H6.b        | 6       | 5:1295113<br>G/A     | ENSG00000164362 | upstream gene variant | <i>TERT*</i>  |                                   |                           | Not tested          |
| H7.d        | 7       | 3:41224610<br>C/A    | ENSG00000168036 | missense variant      | <i>CTNNB1</i> | deleterious (0)                   | possibly damaging (0.64)  | No tissue available |
| H7.a        | 7       | 3:41224610<br>C/A    | ENSG00000168036 | missense variant      | <i>CTNNB1</i> | deleterious (0)                   | possibly damaging (0.64)  | Yes                 |
| H7.b        | 7       | 3:41224610<br>C/A    | ENSG00000168036 | missense variant      | <i>CTNNB1</i> | deleterious (0)                   | possibly damaging (0.64)  | Yes                 |
| H7.c        | 7       | 3:41224610<br>C/A    | ENSG00000168036 | missense variant      | <i>CTNNB1</i> | deleterious (0)                   | possibly damaging (0.64)  | Yes                 |
| H7.e        | 7       | 3:41224610<br>C/A    | ENSG00000168036 | missense variant      | <i>CTNNB1</i> | deleterious (0)                   | possibly damaging (0.64)  | Yes                 |
| H7.d        | 7       | 1:64839716<br>A/G    | ENSG00000162434 | missense variant      | <i>JAK1</i>   | deleterious (0)                   | probably damaging (0.996) | No tissue available |
| H7.a        | 7       | 1:64839716<br>A/G    | ENSG00000162434 | missense variant      | <i>JAK1</i>   | deleterious (0)                   | probably damaging (0.996) | Yes                 |
| H7.b        | 7       | 1:64839716<br>A/G    | ENSG00000162434 | missense variant      | <i>JAK1</i>   | deleterious (0)                   | probably damaging (0.996) | Yes                 |
| H7.c        | 7       | 1:64839716<br>A/G    | ENSG00000162434 | missense variant      | <i>JAK1</i>   | deleterious (0)                   | probably damaging (0.996) | Yes                 |
| H7.e        | 7       | 1:64839716<br>A/G    | ENSG00000162434 | missense variant      | <i>JAK1</i>   | deleterious (0)                   | probably damaging (0.996) | Yes                 |
| H7.a        | 7       | 5:1295135<br>G/A     | ENSG00000164362 | upstream gene variant | <i>TERT*</i>  |                                   |                           | Not tested          |
| H7.b        | 7       | 5:1295135<br>G/A     | ENSG00000164362 | upstream gene variant | <i>TERT*</i>  |                                   |                           | Not tested          |
| H7.c        | 7       | 5:1295135<br>G/A     | ENSG00000164362 | upstream gene variant | <i>TERT*</i>  |                                   |                           | Not tested          |
| H7.d        | 7       | 5:1295135<br>G/A     | ENSG00000164362 | upstream gene variant | <i>TERT*</i>  |                                   |                           | No tissue available |
| H7.e        | 7       | 5:1295135<br>G/A     | ENSG00000164362 | upstream gene variant | <i>TERT*</i>  |                                   |                           | Yes                 |



|       |    |                    |                 |                          |               |                 |                              |               |
|-------|----|--------------------|-----------------|--------------------------|---------------|-----------------|------------------------------|---------------|
| H8.a  | 8  | 5:150117795<br>C/T | ENSG00000113721 | missense<br>variant      | <i>PDGFRB</i> | deleterious (0) | probably damaging (1)        | Yes           |
| H8.b  | 8  | 5:150117795<br>C/T | ENSG00000113721 | missense<br>variant      | <i>PDGFRB</i> | deleterious (0) | probably damaging (1)        | Yes           |
| H8.c  | 8  | 5:150117795<br>C/T | ENSG00000113721 | missense<br>variant      | <i>PDGFRB</i> | deleterious (0) | probably damaging (1)        | Yes           |
| H8.c  | 8  | 17:7675223<br>A/C  | ENSG00000141510 | missense<br>variant      | <i>TP53</i>   | deleterious (0) | probably damaging (1)        | Not validated |
| H8.a  | 8  | 17:7675223<br>A/C  | ENSG00000141510 | missense<br>variant      | <i>TP53</i>   | deleterious (0) | probably damaging (1)        | Yes           |
| H8.b  | 8  | 17:7675223<br>A/C  | ENSG00000141510 | missense<br>variant      | <i>TP53</i>   | deleterious (0) | probably damaging (1)        | Yes           |
| H8.a  | 8  | 5:1295113<br>G/A   | ENSG00000164362 | upstream gene<br>variant | <i>TERT*</i>  |                 |                              | Not tested    |
| H8.b  | 8  | 5:1295113<br>G/A   | ENSG00000164362 | upstream gene<br>variant | <i>TERT*</i>  |                 |                              | Yes           |
| H8.c  | 8  | 5:1295113<br>G/A   | ENSG00000164362 | upstream gene<br>variant | <i>TERT*</i>  |                 |                              | Not tested    |
|       |    |                    |                 |                          |               |                 |                              |               |
| H9.a  | 9  | 5:1295113<br>G/A   | ENSG00000164362 | upstream gene<br>variant | <i>TERT*</i>  |                 |                              | Not tested    |
| H9.b  | 9  | 5:1295113<br>G/A   | ENSG00000164362 | upstream gene<br>variant | <i>TERT*</i>  |                 |                              | Not tested    |
| H9.c  | 9  | 5:1295113<br>G/A   | ENSG00000164362 | upstream gene<br>variant | <i>TERT*</i>  |                 |                              | Not tested    |
| H9.d  | 9  | 5:1295113<br>G/A   | ENSG00000164362 | upstream gene<br>variant | <i>TERT*</i>  |                 |                              | Not tested    |
| H9.e  | 9  | 5:1295113<br>G/A   | ENSG00000164362 | upstream gene<br>variant | <i>TERT*</i>  |                 |                              | Not tested    |
| H9.f  | 9  | 5:1295113<br>G/A   | ENSG00000164362 | upstream gene<br>variant | <i>TERT*</i>  |                 |                              | Yes           |
|       |    |                    |                 |                          |               |                 |                              |               |
| H10.a | 10 | 3:41224607<br>A/C  | ENSG00000168036 | missense<br>variant      | <i>CTNNB1</i> | deleterious (0) | probably damaging<br>(0.959) | Yes           |
| H10.b | 10 | 3:41224607<br>A/C  | ENSG00000168036 | missense<br>variant      | <i>CTNNB1</i> | deleterious (0) | probably damaging<br>(0.959) | Yes           |
| H10.c | 10 | 3:41224607<br>A/C  | ENSG00000168036 | missense<br>variant      | <i>CTNNB1</i> | deleterious (0) | probably damaging<br>(0.959) | Yes           |
| H10.d | 10 | 3:41224607<br>A/C  | ENSG00000168036 | missense<br>variant      | <i>CTNNB1</i> | deleterious (0) | probably damaging<br>(0.959) | Yes           |
| H10.e | 10 | 3:41224607<br>A/C  | ENSG00000168036 | missense<br>variant      | <i>CTNNB1</i> | deleterious (0) | probably damaging<br>(0.959) | Yes           |
| H10.a | 10 | 17:7674885<br>C/A  | ENSG00000141510 | missense<br>variant      | <i>TP53</i>   | deleterious (0) | probably damaging<br>(0.998) | Yes           |
| H10.a | 10 | 17:7674888<br>T/G  | ENSG00000141510 | missense<br>variant      | <i>TP53</i>   | deleterious (0) | probably damaging (1)        | Yes           |
| H10.b | 10 | 17:7674885<br>C/A  | ENSG00000141510 | missense<br>variant      | <i>TP53</i>   | deleterious (0) | probably damaging<br>(0.998) | Yes           |
| H10.b | 10 | 17:7674888<br>T/G  | ENSG00000141510 | missense<br>variant      | <i>TP53</i>   | deleterious (0) | probably damaging (1)        | Yes           |
| H10.c | 10 | 17:7674885<br>C/A  | ENSG00000141510 | missense<br>variant      | <i>TP53</i>   | deleterious (0) | probably damaging<br>(0.998) | Yes           |
| H10.c | 10 | 17:7674888<br>T/G  | ENSG00000141510 | missense<br>variant      | <i>TP53</i>   | deleterious (0) | probably damaging (1)        | Yes           |
| H10.d | 10 | 17:7674885<br>C/A  | ENSG00000141510 | missense<br>variant      | <i>TP53</i>   | deleterious (0) | probably damaging<br>(0.998) | Yes           |
| H10.d | 10 | 17:7674888<br>T/G  | ENSG00000141510 | missense<br>variant      | <i>TP53</i>   | deleterious (0) | probably damaging (1)        | Yes           |
| H10.e | 10 | 17:7674885<br>C/A  | ENSG00000141510 | missense<br>variant      | <i>TP53</i>   | deleterious (0) | probably damaging<br>(0.998) | Yes           |
| H10.e | 10 | 17:7674888<br>T/G  | ENSG00000141510 | missense<br>variant      | <i>TP53</i>   | deleterious (0) | probably damaging (1)        | Yes           |
| H10.a | 10 | 5:1295113<br>G/A   | ENSG00000164362 | upstream gene<br>variant | <i>TERT*</i>  |                 |                              | Not tested    |
| H10.b | 10 | 5:1295113<br>G/A   | ENSG00000164362 | upstream gene<br>variant | <i>TERT*</i>  |                 |                              | Not tested    |
| H10.c | 10 | 5:1295113<br>G/A   | ENSG00000164362 | upstream gene<br>variant | <i>TERT*</i>  |                 |                              | Not tested    |
| H10.d | 10 | 5:1295113<br>G/A   | ENSG00000164362 | upstream gene<br>variant | <i>TERT*</i>  |                 |                              | Not tested    |
| H10.e | 10 | 5:1295113<br>G/A   | ENSG00000164362 | upstream gene<br>variant | <i>TERT*</i>  |                 |                              | Not tested    |

\*Due to low coverage, hot spot TERT mutations were called upon manual inspection of IGV

**Supplemental Table 3. Selection of candidate expressed mutations to validate on DNA (Sanger Seq)**

| Sample code | Patient | Gene           | Chr.  | Mutation position (hg38) | Ref. allele | Alt. allele | Read depth (adj. tissue) | Read depth (tumor tissue) | Variant allele fraction (adj. tissue) | Variant allele fraction (tumor tissue) | Validated with Sanger DNA sequencing |
|-------------|---------|----------------|-------|--------------------------|-------------|-------------|--------------------------|---------------------------|---------------------------------------|----------------------------------------|--------------------------------------|
| H2.a        | 2       | <i>ABCB11</i>  | chr2  | 168970146                | C           | A           | 77                       | 59                        | 0                                     | 0.458                                  | Yes                                  |
| H2.d        |         |                | chr2  | 168970146                | C           | A           | 77                       | 44                        | 0                                     | 0.432                                  | Yes                                  |
| H2.e        |         |                | chr2  | 168970146                | C           | A           | 77                       | 31                        | 0                                     | 0.484                                  | Yes                                  |
| H2.b        | 2       | <i>PCBP1</i>   | chr2  | 70088071                 | G           | T           | 205                      | 138                       | 0.004878                              | 0.413                                  | Yes                                  |
| H2.c        |         |                | chr2  | 70088071                 | G           | T           | 205                      | 102                       | 0.004878                              | 0.46                                   | Yes                                  |
| H2.d        |         |                | chr2  | 70088071                 | G           | T           | 205                      | 123                       | 0.004878                              | 0.455                                  | Yes                                  |
| H3.a        | 3       | <i>LEAP2</i>   | chr5  | 132874044                | G           | C           | 125                      | 107                       | 0.008                                 | 0.523                                  | No tissue available                  |
| H3.b        |         |                | chr5  | 132874044                | G           | C           | 125                      | 84                        | 0.008                                 | 0.417                                  | Yes                                  |
| H3.a        | 3       | <i>NEDD4L</i>  | chr18 | 58367805                 | C           | T           | 18                       | 31                        | 0                                     | 0.548                                  | No tissue available                  |
| H3.b        |         |                | chr18 | 58367805                 | C           | T           | 18                       | 43                        | 0                                     | 0.535                                  | Yes                                  |
| H4.a        | 4       | <i>SUZ12</i>   | chr17 | 31994610                 | A           | G           | 12                       | 13                        | 0                                     | 0.538                                  | Yes                                  |
| H4.e        |         |                | chr17 | 31994610                 | A           | G           | 12                       | 13                        | 0                                     | 0.462                                  | Yes                                  |
| H4.b        | 4       | <i>EPHX1</i>   | chr1  | 225845238                | T           | C           | 182                      | 114                       | 0.005495                              | 0.439                                  | Yes                                  |
| H4.e        |         |                | chr1  | 225845238                | T           | C           | 182                      | 130                       | 0.005495                              | 0.554                                  | Yes                                  |
| H8.a        | 8       | <i>INSIG1</i>  | chr7  | 155302354                | G           | A           | 114                      | 136                       | 0.008772                              | 0.426                                  | Yes                                  |
| H8.c        |         |                | chr7  | 155302354                | G           | A           | 114                      | 143                       | 0.008772                              | 0.406                                  | Yes                                  |
| H8.a        | 8       | <i>SLC25A4</i> | chr4  | 185146940                | T           | A           | 50                       | 48                        | 0                                     | 0.438                                  | Yes                                  |
| H8.b        |         |                | chr4  | 185146940                | T           | A           | 50                       | 49                        | 0                                     | 0.49                                   | Yes                                  |
| H8.c        |         |                | chr4  | 185146940                | T           | A           | 50                       | 48                        | 0                                     | 0.479                                  | Yes                                  |
| H10.a       | 10      | <i>SLC4A4</i>  | chr4  | 71357019                 | G           | T           | 10                       | 29                        | 0                                     | 0.655                                  | Yes                                  |
| H10.b       |         |                | chr4  | 71357019                 | G           | T           | 10                       | 16                        | 0                                     | 0.625                                  | Yes                                  |
| H10.c       |         |                | chr4  | 71357019                 | G           | T           | 10                       | 15                        | 0                                     | 0.533                                  | Yes                                  |
| H10.e       |         |                | chr4  | 71357019                 | G           | T           | 10                       | 23                        | 0                                     | 0.696                                  | Yes                                  |
| H10.a       | 10      | <i>WDR6</i>    | chr3  | 49015681                 | C           | A           | 90                       | 36                        | 0                                     | 0.556                                  | Yes                                  |
| H10.c       |         |                | chr3  | 49015681                 | C           | A           | 90                       | 58                        | 0                                     | 0.569                                  | Yes                                  |
| H10.d       |         |                | chr3  | 49015681                 | C           | A           | 90                       | 63                        | 0                                     | 0.476                                  | Yes                                  |
| H10.e       |         |                | chr3  | 49015681                 | C           | A           | 90                       | 41                        | 0                                     | 0.488                                  | Yes                                  |
| H10.c       | 10      | <i>AR</i>      | chrX  | 67723710                 | A           | G           | 35                       | 19                        | 0.029                                 | 1                                      | Yes                                  |

**Supplemental Table 4. HBV insertions in the multi-regional sampled HCC dataset**

| Sample code | Tissue   | Partner1         | Partner2         | Score    | Discordant reads | Split reads | NearGene1    | NearGene2     | Distance1 | Distance2 |
|-------------|----------|------------------|------------------|----------|------------------|-------------|--------------|---------------|-----------|-----------|
| N1.a        | Adjacent | chrHBV:1802:+    | chr3:96151968:-  | 4.2      | 0                | 206         |              | AC108739.1    | 0         | 14845     |
| N1.a        | Adjacent | chr21:16288549:+ | chrHBV:1826:-    | 1.822857 | 0                | 68          | MIR99AHG     |               | 0         | 0         |
| N1.b        | Adjacent | chrHBV:1817:+    | chr2:229018872:- | 1.8      | 0                | 41          |              | PID1          | 0         | 0         |
| N1.c        | Adjacent | chr2:236228953:+ | chrHBV:1742:-    | 0.6      | 0                | 7           | AC079135.1   |               | 0         | 0         |
| N1.c        | Adjacent | chrHBV:1787:+    | chr7:136827588:- | 0.649143 | 0                | 8           |              | AC009264.1    | 0         | 0         |
| N1.d        | Adjacent | chr2:143204064:- | chrHBV:1828:+    | 2.05     | 0                | 43          | ARHGAP15     |               | 0         | 0         |
| N1.d        | Adjacent | chr14:68720012:+ | chrHBV:1826:-    | 0.25     | 0                | 14          | RAD51B       |               | 0         | 0         |
| H2.a        | HCC      | chr8:36867735:+  | chrHBV:339:+     | 0.7      | 0                | 10          | KCNU1        |               | 0         | 0         |
| H2.a        | HCC      | chrHBV:1783:+    | chr8:37017599:+  | 2.285714 | 0                | 40          |              | AC090453.1    | 0         | -29187    |
| H2.b        | HCC      | chr8:37017599:-  | chrHBV:1783:-    | 23.74514 | 0                | 373         | AC090453.1   |               | -29187    | 0         |
| H2.b        | HCC      | chr8:36863519:+  | chrHBV:343:+     | 0.4      | 0                | 6           | KCNU1        |               | 0         | 0         |
| H2.b        | HCC      | chrHBV:339:-     | chr8:36863519:-  | 0.5      | 0                | 8           |              | KCNU1         | 0         | 0         |
| H2.b        | HCC      | chr8:36867735:+  | chrHBV:339:+     | 2.5      | 0                | 33          | KCNU1        |               | 0         | 0         |
| H2.c        | HCC      | chr8:36867735:+  | chrHBV:343:+     | 0.8      | 0                | 8           | KCNU1        |               | 0         | 0         |
| H2.c        | HCC      | chrHBV:339:-     | chr8:36867735:-  | 0.8      | 0                | 16          |              | KCNU1         | 0         | 0         |
| H2.c        | HCC      | chrHBV:339:-     | chr8:36863519:-  | 0.5      | 0                | 9           |              | KCNU1         | 0         | 0         |
| H2.c        | HCC      | chrHBV:1783:+    | chr8:37017599:+  | 10.54286 | 0                | 147         |              | AC090453.1    | 0         | -29187    |
| H2.d        | HCC      | chr8:37017599:-  | chrHBV:1783:-    | 32.22743 | 0                | 437         | AC090453.1   |               | -29187    | 0         |
| H2.d        | HCC      | chrHBV:1941:-    | chr8:36870690:-  | 0.66     | 0                | 12          |              | KCNU1         | 0         | 0         |
| H2.d        | HCC      | chr8:36867735:+  | chrHBV:343:+     | 1.9      | 0                | 26          | KCNU1        |               | 0         | 0         |
| H2.d        | HCC      | chrHBV:339:-     | chr8:36863519:-  | 0.3      | 0                | 8           |              | KCNU1         | 0         | 0         |
| H2.d        | HCC      | chr8:36867735:+  | chrHBV:339:+     | 1.1      | 0                | 24          | KCNU1        |               | 0         | 0         |
| N2.a        | Adjacent | chrHBV:1814:+    | chr4:44167599:+  | 0.25     | 0                | 12          |              | KCTD8         | 0         | 6310      |
| N2.a        | Adjacent | chr2:215414958:+ | chrHBV:458:-     | 0.279429 | 0                | 9           | FN1          |               | 0         | 0         |
| N2.a        | Adjacent | chr2:231458389:+ | chrHBV:458:-     | 2.4      | 0                | 41          | NCL          |               | 0         | 0         |
| N2.a        | Adjacent | chrHBV:1805:+    | chr10:23099289:- | 0.326857 | 0                | 6           |              | MSRB2         | 0         | 0         |
| N2.b        | Adjacent | chrHBV:1546:+    | chr1:97283110:+  | 2.153143 | 0                | 66          |              | DPYD          | 0         | 0         |
| H3.b        | HCC      | chr6:24482294:+  | chrHBV:1826:-    | 0.65     | 0                | 15          | GPLD1        |               | 0         | 0         |
| N3          | Adjacent | chrHBV:1819:+    | chr7:120346064:- | 0.8      | 0                | 22          |              | KCND2         | 0         | 0         |
| H4.a        | HCC      | chrHBV:1913:-    | chr3:10406683:-  | 0.35     | 0                | 11          |              | ATP2B2        | 0         | 0         |
| N4          | Adjacent | chr4:85490163:-  | chrHBV:1804:-    | 6.7      | 0                | 121         | ARHGAP24     |               | 0         | 0         |
| N4          | Adjacent | chr9:88786306:+  | chrHBV:1784:-    | 4.103429 | 0                | 66          | MIR4289      |               | -40401    | 0         |
| N5          | Adjacent | chrHBV:1755:+    | chr1:244924554:+ | 4        | 0                | 136         |              | RN7SKP55      | 0         | 19356     |
| N5          | Adjacent | chrHBV:458:+     | chr8:100718280:- | 9.829143 | 0                | 139         |              | PABPC1        | 0         | 0         |
| N5          | Adjacent | chrHBV:1819:-    | chr8:100720866:+ | 0.6      | 0                | 7           |              | PABPC1        | 0         | 0         |
| H10.a       | HCC      | chrHBV:458:+     | chr1:30253343:+  | 0.15     | 0                | 7           |              | RP3-357116.1  | 0         | -26728    |
| H10.a       | HCC      | chr1:30233637:-  | chrHBV:458:-     | 1.481143 | 0                | 16          | RP3-357116.1 |               | -7022     | 0         |
| H10.b       | HCC      | chr1:30233637:-  | chrHBV:458:-     | 1.152    | 0                | 18          | RP3-357116.1 |               | -7022     | 0         |
| H10.c       | HCC      | chr6:42822018:-  | chrHBV:458:-     | 1.457143 | 0                | 18          | GLTSCR1L     |               | 0         | 0         |
| H10.c       | HCC      | chr1:30233637:-  | chrHBV:458:-     | 1.4      | 0                | 19          | RP3-357116.1 |               | -7022     | 0         |
| H10.c       | HCC      | chrHBV:1718:+    | chr1:30233637:+  | 0.579429 | 0                | 7           |              | RP3-357116.1  | 0         | -7022     |
| H10.d       | HCC      | chr1:30233637:-  | chrHBV:458:-     | 1.081143 | 0                | 22          | RP3-357116.1 |               | -7022     | 0         |
| H10.e       | HCC      | chrHBV:458:+     | chr6:42810306:+  | 0.177143 | 0                | 6           |              | GLTSCR1L      | 0         | 0         |
| H10.e       | HCC      | chr6:42822018:-  | chrHBV:458:-     | 1.8      | 0                | 24          | GLTSCR1L     |               | 0         | 0         |
| H10.e       | HCC      | chr1:30233637:-  | chrHBV:458:-     | 0.290286 | 0                | 6           | RP3-357116.1 |               | -7022     | 0         |
| N10.b       | Adjacent | chrHBV:1802:+    | chr5:17918348:+  | 0.388571 | 0                | 6           |              | RP11-454P21.1 | 0         | 0         |

**Supplemental Table 5.** List of primers used for Sanger sequencing

| <b>Gene</b>        | <b>Ensembl ID</b> | <b>Chr.</b> | <b>Sequence (5' to 3')</b> |
|--------------------|-------------------|-------------|----------------------------|
| <i>TERT Prom</i>   | ENSG00000164362   | 5           | CAGCGCTGCCTGAAACTC         |
| <i>TERT Prom</i>   | ENSG00000164362   | 5           | GTCCTGCCCTTCACCTT          |
| <i>CTNNB1</i>      | ENSG00000168036   | 3           | GATTTGATGGAGTTGGACATGG     |
| <i>CTNNB1</i>      | ENSG00000168036   | 3           | TGTTCTTGAGTGAAGGACTGAG     |
| <i>PDGFRB(I)</i>   | ENSG00000113721   | 22          | GCCCGGAACAATATGCCAAGA      |
| <i>PDGFRB (I)</i>  | ENSG00000113721   | 22          | TCGGTTTTTCACTGATTCCTG      |
| <i>PDGFRB(II)</i>  | ENSG00000113721   | 22          | GGTCAGGCAGGGGGATGATA       |
| <i>PDGFRB (II)</i> | ENSG00000113721   | 22          | GGGATGGGCTCGGTTAGAAG       |
| <i>TP53 (I)</i>    | ENSG00000141510   | 5           | TGTTCACTTGTGCCCTGACT       |
| <i>TP53 (I)</i>    | ENSG00000141510   | 5           | AACCAGCCCTGTCGTCTCT        |
| <i>TP53 (II)</i>   | ENSG00000141510   | 6           | TTACTTTGCACATCTCATGGGG     |
| <i>TP53 (II)</i>   | ENSG00000141510   | 6           | GCTGCTCAGATAGCGATGGT       |
| <i>ATM</i>         | ENSG00000149311   | 11          | TCCCCCTGTTATACCCAGTTG      |
| <i>ATM</i>         | ENSG00000149311   | 11          | TCTGCTACCACTGCTTCAAAT      |
| <i>ARIDIA</i>      | ENSG00000117713   | 1           | CCTCAACCAACTGCTCACG        |
| <i>ARIDIA</i>      | ENSG00000117713   | 1           | AAACCCAACACAAAGGCTGAAG     |
| <i>JAK1</i>        | ENSG00000162434   | 1           | CCAGCCTTGCATAACATACCG      |
| <i>JAK1</i>        | ENSG00000162434   | 1           | GCAAGTACAGTCCAGGTGAGA      |
| <i>ABCB11</i>      | ENSG00000073734   | 2           | GCAGCACAAGCATTTCACAT       |
| <i>ABCB11</i>      | ENSG00000073734   | 2           | TTTACACAGCCCAGTAAACCT      |
| <i>AR</i>          | ENSG00000169083   | X           | GGGAGGAAACAAAAGGCTGAAA     |
| <i>AR</i>          | ENSG00000169083   | X           | ACACAGATAGGAGCCACAATGG     |
| <i>EPHX1</i>       | ENSG00000143819   | 1           | CTCCGTCGGCTCTTTCACTT       |
| <i>EPHX1</i>       | ENSG00000143819   | 1           | ACTGAGTTCCAGCCGCTTTT       |
| <i>INSIG1</i>      | ENSG00000186480   | 7           | CCCATGTTTTTAACCCTTGTTGGT   |
| <i>INSIG1</i>      | ENSG00000186480   | 7           | ACTACTTGGTTTTTCCTTTGCGT    |
| <i>LEAP2</i>       | ENSG00000164406   | 5           | TACAGCATCTGCGGAATGGA       |
| <i>LEAP2</i>       | ENSG00000164406   | 5           | ATGGAAAGGCACCACTCTTTCA     |
| <i>NEDD4L</i>      | ENSG00000049759   | 18          | AGGTACAGAATGCTCGCAGG       |
| <i>NEDD4L</i>      | ENSG00000049759   | 18          | AGTGCCCAAATAAGCTACCAGA     |
| <i>PCBP1</i>       | ENSG00000169564   | 2           | GGATCAACATCTCGGAGGGG       |
| <i>PCBP1</i>       | ENSG00000169564   | 2           | TGACACACTCGGTGACAGAC       |
| <i>SLC25A4</i>     | ENSG00000151729   | 4           | TTTCTCCAGCGTTACGGAG        |
| <i>SLC25A4</i>     | ENSG00000151729   | 4           | GAAAGCGTGCATTAAGTGGTCT     |
| <i>SLC4A4</i>      | ENSG00000080493   | 4           | CAATGCCCATATCTGTGTACCCT    |
| <i>SLC4A4</i>      | ENSG00000080493   | 4           | ACAGGAGACGGTGTAAAGGTG      |
| <i>SUZ12</i>       | ENSG00000178691   | 17          | CTGGTGTGCCTGGCCTATTTT      |
| <i>SUZ12</i>       | ENSG00000178691   | 17          | GCCCTTTTTACCTACCTGCACA     |
| <i>WDR6</i>        | ENSG00000178252   | 3           | CGACTCCCCATGACAAGACA       |
| <i>WDR6</i>        | ENSG00000178252   | 3           | GGCATAGACAACCAGGACACT      |

**Supplemental Table 6.** List of genes included in the capture panel for targeted DNA

| Gene          | Ensembl ID      | Chr. | Coordinates (hg38) |           |
|---------------|-----------------|------|--------------------|-----------|
|               |                 |      | Gene start         | Gene end  |
| <i>ACVR2A</i> | ENSG00000121989 | 2    | 147844517          | 147930826 |
| <i>ALB</i>    | ENSG00000163631 | 4    | 73397114           | 73421412  |
| <i>APOB</i>   | ENSG00000084674 | 2    | 21001429           | 21044073  |
| <i>ARID1A</i> | ENSG00000117713 | 1    | 26693236           | 26782104  |
| <i>ARID2</i>  | ENSG00000189079 | 12   | 45729665           | 45908040  |
| <i>ATM</i>    | ENSG00000149311 | 11   | 108222484          | 108369102 |
| <i>AXIN1</i>  | ENSG00000103126 | 16   | 287440             | 352673    |
| <i>BRAF</i>   | ENSG00000157764 | 7    | 140719327          | 140924764 |
| <i>CCND1</i>  | ENSG00000110092 | 11   | 69641087           | 69654474  |
| <i>CCNE1</i>  | ENSG00000105173 | 19   | 29811989           | 29824308  |
| <i>CDK4</i>   | ENSG00000135446 | 12   | 57747727           | 57756013  |
| <i>CDK6</i>   | ENSG00000105810 | 7    | 92604921           | 92836694  |
| <i>CDKN2A</i> | ENSG00000147889 | 9    | 21967753           | 21995301  |
| <i>CDKN2B</i> | ENSG00000147883 | 9    | 22002903           | 22009363  |
| <i>CTNNB1</i> | ENSG00000168036 | 3    | 41194837           | 41260096  |
| <i>ERBB3</i>  | ENSG00000065361 | 12   | 56079857           | 56103505  |
| <i>EGFR</i>   | ENSG00000146648 | 7    | 55019021           | 55211628  |
| <i>FEZF2</i>  | ENSG00000153266 | 3    | 62369681           | 62374324  |
| <i>FGA</i>    | ENSG00000171560 | 4    | 154583126          | 154590766 |
| <i>FGF19</i>  | ENSG00000162344 | 11   | 69698232           | 69704642  |
| <i>FGF3</i>   | ENSG00000186895 | 11   | 69810224           | 69819024  |
| <i>FGF4</i>   | ENSG00000075388 | 11   | 69771016           | 69775403  |
| <i>FLT4</i>   | ENSG00000037280 | 5    | 180601506          | 180649624 |
| <i>FOXI3</i>  | ENSG00000214336 | 2    | 88446787           | 88452656  |
| <i>FZRI</i>   | ENSG00000105325 | 19   | 3506273            | 3538330   |
| <i>HIFNT</i>  | ENSG00000187166 | 12   | 48328980           | 48330279  |
| <i>HEY1</i>   | ENSG00000164683 | 8    | 79764010           | 79767863  |
| <i>HNF1A</i>  | ENSG00000135100 | 12   | 120978543          | 121002512 |
| <i>HRAS</i>   | ENSG00000174775 | 11   | 532242             | 537287    |
| <i>IDH1</i>   | ENSG00000138413 | 2    | 208236227          | 208266074 |
| <i>IL6ST</i>  | ENSG00000134352 | 5    | 55935095           | 55994993  |
| <i>IRF2</i>   | ENSG00000168310 | 4    | 184387713          | 184474580 |
| <i>JAK1</i>   | ENSG00000162434 | 1    | 64833229           | 64966504  |
| <i>JAK3</i>   | ENSG00000105639 | 19   | 17824780           | 17848071  |
| <i>KEAP1</i>  | ENSG00000079999 | 19   | 10486120           | 10503741  |
| <i>KMT2D</i>  | ENSG00000167548 | 12   | 49018975           | 49059774  |
| <i>KRAS</i>   | ENSG00000133703 | 12   | 25204789           | 25250936  |
| <i>MET</i>    | ENSG00000105976 | 7    | 116672390          | 116798386 |
| <i>MYC</i>    | ENSG00000136997 | 8    | 127735434          | 127741434 |
| <i>NCOR1</i>  | ENSG00000141027 | 17   | 16029157           | 16218185  |
| <i>NFE2L2</i> | ENSG00000116044 | 2    | 177227595          | 177392697 |
| <i>NRAS</i>   | ENSG00000213281 | 1    | 114704469          | 114716894 |
| <i>NTRK3</i>  | ENSG00000140538 | 15   | 87859751           | 88256768  |
| <i>PDGFRB</i> | ENSG00000113721 | 5    | 150113837          | 150155872 |



|                      |                 |    |           |           |
|----------------------|-----------------|----|-----------|-----------|
| <i>PIK3CA</i>        | ENSG00000121879 | 3  | 179148114 | 179240093 |
| <i>PSMB11</i>        | ENSG00000222028 | 14 | 23042167  | 23044276  |
| <i>PTEN</i>          | ENSG00000171862 | 10 | 87863113  | 87971930  |
| <i>PTPN3</i>         | ENSG00000070159 | 9  | 109375466 | 109498313 |
| <i>RBI</i>           | ENSG00000139687 | 13 | 48303751  | 48481986  |
| <i>RET</i>           | ENSG00000165731 | 10 | 43077027  | 43130351  |
| <i>RPS6KA3</i>       | ENSG00000177189 | X  | 20149911  | 20267100  |
| <i>SMC3</i>          | ENSG00000108055 | 10 | 110567691 | 110604636 |
| <i>SRCAP</i>         | ENSG00000080603 | 16 | 30698209  | 30741409  |
| <i>TERT promoter</i> | NA              | 5  | 1295151   | 1295347   |
| <i>TP53</i>          | ENSG00000141510 | 17 | 7661779   | 7687550   |
| <i>TSC1</i>          | ENSG00000165699 | 9  | 132891348 | 132944633 |
| <i>TSC2</i>          | ENSG00000103197 | 16 | 2047465   | 2088720   |
| <i>VEGFA</i>         | ENSG00000112715 | 6  | 43770184  | 43786487  |

**Supplemental Table 7. Final terms in the Cox regression model**

| <b>Model including ITH signature (principal components)</b> | <b>Coef</b> | <b>S.E.</b> | <b>Z</b> | <b>Pr(&gt; Z )</b> |
|-------------------------------------------------------------|-------------|-------------|----------|--------------------|
| Clustering Coefficient (mean)                               | -25.736     | 21.2162     | -1.213   | 0.2251             |
| Neighborhood Connectivity (sd)                              | -0.4791     | 0.1626      | -2.9475  | 0.0032             |
| Neighborhood Connectivity (mean)                            | 0.4042      | 0.1655      | 2.4426   | 0.0146             |
| Immune Reads/Clone                                          | 2.5172      | 0.8466      | 2.9732   | 0.0029             |
| HLA-I B expression                                          | 0.0015      | 6.00E-04    | 2.7345   | 0.0062             |
| ITH signature (PC4)                                         | -0.065      | 0.0141      | -4.6155  | <0.0001            |
| ITH signature (PC2)                                         | -0.0088     | 0.0054      | -1.6513  | 0.0987             |
| Tumor clones (DNA)                                          | 0.2872      | 0.0712      | 4.0354   | 1.00E-04           |
| CD8A expression                                             | -0.4155     | 0.1163      | -3.5719  | 4.00E-04           |
| ITH signature (PC1)                                         | -0.0334     | 0.0071      | -4.673   | <0.0001            |
| DNA mutation count                                          | 0.217       | 0.1331      | 1.631    | 0.1029             |
| CTLA4 expression                                            | -0.1655     | 0.0971      | -1.7038  | 0.0884             |
| CD274 expression                                            | -0.2083     | 0.1313      | -1.5857  | 0.1128             |

| <b>Model including G3 signature</b> | <b>Coef</b> | <b>S.E.</b> | <b>Z</b> | <b>Pr(&gt; Z )</b> |
|-------------------------------------|-------------|-------------|----------|--------------------|
| G3 class                            | 1.1829      | 0.2769      | 4.2716   | <0.0001            |
| Tumor Clones (DNA)                  | 0.2214      | 0.0661      | 3.3483   | 8.00E-04           |
| Immune Reads/Clone                  | 1.6453      | 0.7704      | 2.1357   | 0.0327             |
| HLA-I A expression                  | 0.0018      | 6.00E-04    | 3.0726   | 0.0021             |
| CD8A expression                     | -0.2012     | 0.0817      | -2.4639  | 0.0137             |
| Neighborhood Connectivity (sd)      | -0.3772     | 0.1447      | -2.6078  | 0.0091             |
| Neighborhood Connectivity (mean)    | 0.3119      | 0.1412      | 2.2096   | 0.0271             |
| Clustering Coefficient (mean)       | -22.6871    | 18.1191     | -1.2521  | 0.2105             |
