# Supplementary material for: Intratumoral heterogeneity and clonal evolution in liver cancer
Source: PubMed Central journal article supplement (PMC6962317; doi:10.1038/s41467-019-14050-z), 2020-01-15
Supplement: 41467_2019_14050_MOESM2_ESM.pdf [file 41467_2019_14050_MOESM2_ESM.pdf]

## Description of Additional Supplementary Files

File Name: Supplementary Data 1

Description: Expressed somatic mutations in the multi-regional sampled HCC dataset

File Name: Supplementary Data 2

Description: HCC regional neo-epitopes and putative immunogenicity

File Name: Supplementary Data 3

Description: ITH signature

File Name: Supplementary Data 4

Description: Differentially expressed genes across single cell sequencing clusters

File Name: Supplementary Data 5

Description: Percentage of HCC cells with predicted transcription factors "on" as per SCENIC analysis
